# Supplementary material
Source: MDPI journal article supplement (https://www.mdpi.com/2218-2004/11/12/157)
Supplement: s1 [file s1]

## Optimized B3LYP/aug-cc-pVTZ geometries, CCSD(T)/aug-cc-pVTZ energies

### CH<sub>2</sub>OO + CH<sub>4</sub> reaction

Isomer 1(CH<sub>3</sub>CH<sub>2</sub>OOH)

Sum of electronic and zero-point Energies = -229.6563545

|   |           |           |           |
|---|-----------|-----------|-----------|
| C | 0.570931  | 0.629466  | 0.254338  |
| O | -0.701201 | 0.576943  | -0.387730 |
| H | 0.421586  | 0.715554  | 1.333560  |
| H | 0.977221  | 1.575663  | -0.110207 |
| O | -1.460747 | -0.493710 | 0.241775  |
| C | 1.485273  | -0.531862 | -0.091336 |
| H | 1.071593  | -1.474031 | 0.265685  |
| H | 1.638452  | -0.598834 | -1.169016 |
| H | 2.457954  | -0.392104 | 0.383510  |
| H | -1.608441 | -1.077734 | -0.513893 |

CH<sub>2</sub>OO

Sum of electronic and zero-point Energies = -189.3004316

|   |           |           |          |
|---|-----------|-----------|----------|
| C | 1.069800  | -0.194558 | 0.000000 |
| O | 0.000000  | 0.459256  | 0.000000 |
| H | 1.030584  | -1.277037 | 0.000000 |
| H | 1.974124  | 0.396906  | 0.000000 |
| O | -1.177938 | -0.203321 | 0.000000 |

CH<sub>3</sub>CH<sub>2</sub>O

Sum of electronic and zero-point Energies = -154.0679688

|   |           |           |           |
|---|-----------|-----------|-----------|
| C | 0.179025  | 0.474895  | -0.000190 |
| O | 1.255779  | -0.362933 | -0.000232 |
| C | -1.188099 | -0.194666 | -0.000007 |
| H | 0.300783  | 1.159260  | -0.861263 |
| H | 0.302065  | 1.154843  | 0.864488  |
| H | -1.306282 | -0.820839 | -0.884268 |
| H | -1.304715 | -0.823904 | 0.882267  |
| H | -1.983639 | 0.552730  | 0.001813  |

## TS1

Sum of electronic and zero-point Energies = -229.6563545

|   |           |           |           |
|---|-----------|-----------|-----------|
| C | -0.168127 | 1.013835  | 0.230017  |
| O | -1.032663 | 0.258066  | -0.364981 |
| H | -0.040701 | 0.920979  | 1.300125  |
| H | 0.002691  | 1.966982  | -0.258529 |
| O | -0.861604 | -1.027519 | 0.178009  |
| C | 1.620422  | -0.229050 | -0.095722 |
| H | 2.141125  | -0.934781 | 0.559641  |
| H | 1.800677  | -0.463812 | -1.143780 |
| H | 2.069973  | 0.740797  | 0.112817  |
| H | 0.466601  | -0.783250 | 0.119724  |

## TS2

Sum of electronic and zero-point Energies = -229.6957815

|   |           |           |           |
|---|-----------|-----------|-----------|
| C | -0.465075 | 0.269269  | 0.453251  |
| O | 0.375503  | 0.904927  | -0.318663 |
| C | -1.656517 | -0.426056 | -0.187835 |
| H | -0.633073 | 0.753453  | 1.428923  |
| H | -2.385729 | 0.314088  | -0.522282 |
| H | -2.142884 | -1.087368 | 0.529028  |
| H | -1.336129 | -1.008605 | -1.050132 |
| H | 0.355357  | -0.597783 | 0.756199  |
| O | 1.661461  | -0.491489 | 0.006561  |
| 1 | 0         | 2.576306  | -0.740561 |
|   |           |           | -0.237420 |

## TS3

Sum of electronic and zero-point Energies = -229.6813895

|   |           |           |           |
|---|-----------|-----------|-----------|
| C | 0.918232  | -0.418928 | 0.271696  |
| O | -0.034700 | -1.154576 | -0.252138 |
| C | 0.814314  | 1.042425  | -0.136878 |
| H | 1.863134  | -0.654591 | -0.294182 |
| H | 1.097625  | -0.546385 | 1.347784  |
| H | 0.867297  | 1.227869  | -1.207579 |
| H | 1.422164  | 1.734046  | 0.440269  |
| H | -0.389136 | 0.989946  | 0.080157  |
| O | -1.646154 | 0.409011  | 0.111846  |
| H | -1.809526 | -0.527347 | -0.053024 |

## TS5

Sum of electronic and zero-point Energies = -229.6534207

|   |           |           |           |
|---|-----------|-----------|-----------|
| C | 0.448808  | -1.044912 | -0.056001 |
| O | 1.339631  | -0.169661 | 0.064503  |
| C | -1.575168 | -0.254245 | 0.031620  |
| H | 0.181131  | -1.639000 | 0.825531  |
| H | 0.258360  | -1.477833 | -1.045330 |
| H | -1.712970 | 0.058548  | 1.052006  |
| H | -1.776409 | -1.292205 | -0.185908 |
| H | -1.892255 | 0.436718  | -0.728526 |
| O | 0.094856  | 1.344099  | -0.035383 |
| H | 0.224406  | 2.313204  | -0.004446 |

## TS6

Sum of electronic and zero-point Energies = -154.0395105

|   |           |           |           |
|---|-----------|-----------|-----------|
| C | -0.574585 | 0.547662  | 0.000000  |
| O | -1.243117 | -0.481528 | 0.000000  |
| C | 1.521983  | -0.164316 | 0.000000  |
| H | -0.379687 | 1.103571  | 0.932385  |
| H | -0.379687 | 1.103570  | -0.932386 |
| H | 2.025538  | 0.792075  | 0.000032  |
| H | 1.497177  | -0.723559 | 0.922431  |
| H | 1.497200  | -0.723509 | -0.922462 |

## TS7

Sum of electronic and zero-point Energies = -154.0327304

|   |           |           |           |
|---|-----------|-----------|-----------|
| C | -0.223426 | 0.300104  | -0.221503 |
| O | -1.217461 | -0.341416 | 0.076725  |
| C | 1.185526  | -0.165858 | 0.046700  |
| H | -0.323744 | 1.622039  | 1.069093  |
| H | -0.316276 | 1.176313  | -0.895197 |
| H | 1.540742  | -0.685124 | -0.848782 |
| H | 1.857130  | 0.673166  | 0.226506  |
| H | 1.209237  | -0.860538 | 0.883397  |

## CH<sub>3</sub>CHOO + CH<sub>4</sub> reaction

Isomer 1(CH<sub>3</sub>)<sub>2</sub>CHOOH

Sum of electronic and zero-point Energies = -268.989704

|   |           |           |           |
|---|-----------|-----------|-----------|
| C | 0.524838  | 0.012689  | 0.459112  |
| O | -0.883543 | -0.062262 | 0.742430  |
| C | 1.021217  | -1.232732 | -0.261515 |
| H | 0.918669  | 0.022043  | 1.480181  |
| H | 0.725109  | -2.130548 | 0.279864  |
| H | 2.109503  | -1.215608 | -0.334235 |
| H | 0.612122  | -1.285081 | -1.269554 |
| O | -1.612228 | -0.131859 | -0.517585 |
| C | 0.903303  | 1.312383  | -0.237971 |
| H | 0.508857  | 1.338836  | -1.253334 |
| H | 0.519232  | 2.171661  | 0.312461  |
| H | 1.988562  | 1.403861  | -0.296758 |
| H | -2.112032 | 0.693763  | -0.475146 |

*syn*-CH<sub>3</sub>CHOO

Sum of electronic and zero-point Energies = -228.5320864

|   |           |           |           |
|---|-----------|-----------|-----------|
| C | 0.481784  | 0.697590  | -0.000048 |
| O | -0.774843 | 0.588580  | 0.000027  |
| H | 0.816840  | 1.727863  | -0.000090 |
| C | 1.364337  | -0.472685 | -0.000073 |
| H | 1.129970  | -1.098354 | -0.867006 |
| H | 1.130197  | -1.098223 | 0.867017  |
| H | 2.410539  | -0.180727 | -0.000221 |
| O | -1.295691 | -0.676079 | 0.000102  |

*anti*-CH<sub>3</sub>CHOO

Sum of electronic and zero-point Energies = -228.5265338

|   |           |           |           |
|---|-----------|-----------|-----------|
| C | -0.380511 | 0.407665  | 0.000055  |
| O | 0.571544  | -0.409438 | -0.000103 |
| H | -0.120046 | 1.462482  | 0.000216  |
| C | -1.768542 | -0.097931 | 0.000050  |
| H | -1.787220 | -1.185029 | -0.000627 |
| H | -2.303647 | 0.276214  | -0.876934 |
| H | -2.303224 | 0.275062  | 0.877794  |
| O | 1.854513  | 0.073546  | -0.000032 |

(CH<sub>3</sub>)<sub>2</sub>CHO

Sum of electronic and zero-point Energies = -193.2857443

|   |           |           |           |
|---|-----------|-----------|-----------|
| C | 0.022639  | 0.126313  | 0.365000  |
| O | -0.226425 | 1.368849  | -0.156661 |
| C | 1.354554  | -0.460169 | -0.100741 |
| C | -1.184645 | -0.740517 | -0.093173 |
| H | -0.020369 | 0.165235  | 1.464998  |
| H | 1.366044  | -0.568180 | -1.185698 |
| H | 1.522925  | -1.438231 | 0.353603  |
| H | 2.176010  | 0.195173  | 0.187846  |
| H | -2.119694 | -0.317264 | 0.266058  |
| H | -1.210261 | -0.800263 | -1.179877 |
| H | -1.058540 | -1.741022 | 0.319843  |

TS1

Sum of electronic and zero-point Energies = -268.8839027

|   |           |           |           |
|---|-----------|-----------|-----------|
| C | -0.512201 | -0.210085 | 0.380551  |
| O | 0.210222  | -1.048017 | -0.302690 |
| C | -1.908925 | 0.000020  | -0.076661 |
| O | 1.548852  | -0.828902 | 0.080577  |
| H | -0.257021 | -0.086120 | 1.425178  |
| H | -1.992202 | -0.122598 | -1.154117 |
| H | -2.240713 | 0.999443  | 0.202465  |
| H | -2.573797 | -0.714101 | 0.417163  |
| C | 0.692105  | 1.624442  | -0.088593 |
| H | 1.668401  | 2.096749  | 0.078172  |
| H | 0.400373  | 1.782645  | -1.124717 |
| H | -0.001183 | 2.135435  | 0.575479  |
| H | 1.297676  | 0.437637  | 0.065505  |

TS2

Sum of electronic and zero-point Energies = -268.8793495

|   |           |           |           |
|---|-----------|-----------|-----------|
| C | 0.557038  | 0.083259  | 0.620855  |
| O | 0.008102  | -1.099821 | 0.583197  |
| C | 1.476245  | 0.594346  | -0.438543 |
| H | 0.763493  | 0.378227  | 1.647618  |
| H | 2.471753  | 0.181611  | -0.241684 |
| H | 1.553322  | 1.678739  | -0.386427 |
| H | 1.156093  | 0.289692  | -1.428358 |
| O | -0.642849 | -1.223205 | -0.661439 |
| C | -1.271428 | 1.218745  | 0.028281  |
| H | -1.387487 | 1.736382  | -0.926897 |
| H | -2.240790 | 1.002264  | 0.479740  |
| H | -0.765048 | 1.916457  | 0.693071  |
| H | -1.044492 | 0.022733  | -0.474685 |

## TS3

Sum of electronic and zero-point Energies = -268.9129397

|   |           |           |           |
|---|-----------|-----------|-----------|
| C | 0.351430  | 0.001885  | 0.005964  |
| O | -0.593505 | -0.021718 | 0.930262  |
| C | 1.163537  | -1.285050 | -0.159353 |
| C | 1.097616  | 1.332887  | -0.150863 |
| H | -0.571007 | -0.006221 | -0.856533 |
| H | 1.912111  | -1.370231 | 0.639691  |
| H | 1.691908  | -1.297862 | -1.118410 |
| H | 0.502632  | -2.154331 | -0.104622 |
| H | 0.396286  | 2.170579  | -0.094943 |
| H | 1.836598  | 1.451562  | 0.652312  |
| H | 1.629050  | 1.376444  | -1.107133 |
| O | -1.977736 | -0.124747 | -0.402705 |
| H | -2.503147 | 0.703441  | -0.405316 |

## TS5

Sum of electronic and zero-point Energies = -268.880257

|   |           |           |           |
|---|-----------|-----------|-----------|
| C | -0.689868 | -0.093839 | 0.525828  |
| O | -0.059630 | -1.163308 | 0.668916  |
| C | -1.651518 | 0.101858  | -0.620059 |
| H | -0.830942 | 0.501419  | 1.438757  |
| H | -2.001962 | 1.130919  | -0.695592 |
| H | -2.521284 | -0.541535 | -0.464982 |
| H | -1.173842 | -0.193939 | -1.552338 |
| C | 0.780493  | 1.580579  | 0.179880  |
| H | 1.408349  | 1.441072  | 1.043425  |
| H | -0.103918 | 2.187884  | 0.286804  |
| H | 1.269124  | 1.616584  | -0.775741 |
| O | 1.453958  | -0.647641 | -0.527845 |
| H | 2.165212  | -1.186400 | -0.922791 |

## TS6

Sum of electronic and zero-point Energies = -268.8987442

|   |           |           |           |
|---|-----------|-----------|-----------|
| C | 0.472815  | -0.085598 | 0.398650  |
| O | -0.174275 | -1.083852 | -0.164393 |
| C | -0.030468 | 1.254456  | -0.096001 |
| C | 2.000697  | -0.155917 | -0.108802 |
| H | 0.499631  | -0.115422 | 1.499534  |
| H | 0.037919  | 1.401023  | -1.172503 |
| H | 0.306896  | 2.122455  | 0.464874  |
| H | 2.550802  | 0.676016  | 0.320548  |
| H | 2.027905  | -0.124622 | -1.193534 |
| H | 2.397232  | -1.100179 | 0.251272  |
| H | -1.182297 | 0.879460  | 0.054509  |
| O | -2.230105 | -0.022238 | 0.002908  |
| H | -2.061310 | -0.967659 | -0.095901 |

## TS7

Sum of electronic and zero-point Energies = -193.2621824

|   |           |           |           |
|---|-----------|-----------|-----------|
| C | -0.311446 | 0.274535  | 0.382655  |
| O | -0.290070 | 1.366950  | -0.198456 |
| C | 1.658516  | -0.438153 | -0.079090 |
| C | -1.167199 | -0.875173 | -0.108214 |
| H | -0.032221 | 0.226551  | 1.452015  |
| H | 1.559630  | -0.535647 | -1.149909 |
| H | 1.682733  | -1.349181 | 0.502360  |
| H | 2.242592  | 0.395034  | 0.280353  |
| H | -2.194334 | -0.686735 | 0.216635  |
| H | -1.162440 | -0.921768 | -1.195957 |
| H | -0.854618 | -1.831114 | 0.310048  |

## TS8

Sum of electronic and zero-point Energies = -193.2550899

|   |           |           |           |
|---|-----------|-----------|-----------|
| C | -0.000001 | 0.169901  | 0.042691  |
| O | -0.000003 | 1.390367  | -0.109634 |
| C | 1.294181  | -0.623819 | -0.049987 |
| C | -1.294178 | -0.623823 | -0.049987 |
| H | 0.000000  | 0.261016  | 1.826488  |
| H | 1.405805  | -0.957423 | -1.085964 |
| H | 1.284275  | -1.510489 | 0.581982  |
| H | 2.141182  | 0.009170  | 0.201122  |
| H | -2.141182 | 0.009163  | 0.201119  |
| H | -1.405800 | -0.957431 | -1.085964 |
| H | -1.284270 | -1.510491 | 0.581984  |

### **(CH<sub>3</sub>)<sub>2</sub>COO + CH<sub>4</sub> reaction**

Isomer **1**(CH<sub>3</sub>)<sub>3</sub>COOH

Sum of electronic and zero-point Energies = -308.2118403

|   |           |           |           |
|---|-----------|-----------|-----------|
| C | -0.388992 | -0.000056 | 0.034739  |
| O | 0.738328  | 0.064727  | -0.876992 |
| C | -1.568412 | 0.138744  | -0.927236 |
| C | -0.409766 | -1.351556 | 0.745815  |
| H | -1.529207 | 1.091565  | -1.454622 |
| H | -2.504049 | 0.090364  | -0.370352 |
| H | -1.561192 | -0.665577 | -1.661889 |
| H | -0.426426 | -2.162993 | 0.018414  |
| H | -1.296552 | -1.432789 | 1.375658  |
| H | 0.469735  | -1.470685 | 1.375646  |
| O | 1.978781  | -0.098653 | -0.135031 |
| C | -0.343306 | 1.162431  | 1.025053  |
| H | 0.524391  | 1.083629  | 1.678265  |
| H | -0.300394 | 2.115251  | 0.495803  |
| H | -1.236205 | 1.160300  | 1.651105  |
| H | 2.385885  | 0.764968  | -0.282073 |

(CH<sub>3</sub>)<sub>2</sub>COO

Sum of electronic and zero-point Energies = -267.7587605

|   |           |           |           |
|---|-----------|-----------|-----------|
| C | 0.378055  | 0.024809  | -0.000028 |
| O | -0.567029 | -0.816222 | -0.000049 |
| C | 1.751770  | -0.540879 | 0.000016  |
| C | 0.071752  | 1.465329  | -0.000026 |
| O | -1.857668 | -0.326479 | 0.000034  |
| H | 1.722556  | -1.627513 | -0.000319 |
| H | 2.301624  | -0.192337 | 0.877845  |
| H | 2.301998  | -0.191799 | -0.877357 |
| H | -0.557287 | 1.694495  | -0.864785 |
| H | 0.975459  | 2.068708  | -0.000564 |
| H | -0.556239 | 1.694507  | 0.865526  |



(CH<sub>3</sub>)<sub>3</sub>CO

Sum of electronic and zero-point Energies = -232.506446

|   |           |           |           |
|---|-----------|-----------|-----------|
| C | 0.000051  | -0.027832 | 0.082332  |
| O | -0.000308 | 0.268915  | 1.426665  |
| C | -1.272663 | -0.794109 | -0.311702 |
| C | -0.002068 | 1.383969  | -0.582035 |
| C | 1.274946  | -0.790402 | -0.311808 |
| H | -1.300446 | -0.979025 | -1.386406 |
| H | -2.158439 | -0.227501 | -0.027661 |
| H | -1.301955 | -1.755964 | 0.200653  |
| H | -0.001575 | 1.245120  | -1.663455 |
| H | 0.884232  | 1.943915  | -0.291483 |
| H | -0.890303 | 1.941057  | -0.291909 |
| H | 2.159134  | -0.220907 | -0.028581 |
| H | 1.302786  | -0.975966 | -1.386399 |
| H | 1.307434  | -1.751804 | 0.201199  |

TS1

Sum of electronic and zero-point Energies = -308.1068796

|   |           |           |           |
|---|-----------|-----------|-----------|
| C | -0.495322 | -0.169860 | -0.013966 |
| O | 0.302361  | -0.850699 | -0.804827 |
| C | -1.735994 | 0.297231  | -0.703656 |
| C | -0.569852 | -0.484078 | 1.449864  |
| H | -1.562035 | 0.433505  | -1.767866 |
| H | -2.070878 | 1.238025  | -0.268285 |
| H | -2.539151 | -0.431173 | -0.561550 |
| H | -1.259523 | -1.326633 | 1.574494  |
| H | -0.972591 | 0.358676  | 2.007031  |
| H | 0.398941  | -0.761909 | 1.847328  |
| O | 1.594446  | -0.846373 | -0.242580 |
| C | 0.904617  | 1.630940  | 0.116191  |
| H | 1.784749  | 1.948300  | 0.687382  |
| H | 0.963661  | 2.029427  | -0.895495 |
| H | 0.048355  | 2.066053  | 0.624538  |
| H | 1.413325  | 0.376902  | 0.041084  |

## TS2

Sum of electronic and zero-point Energies = -308.1212374

|   |           |           |           |
|---|-----------|-----------|-----------|
| C | -0.404511 | 0.063056  | -0.044276 |
| O | 0.286622  | -0.132746 | -1.146623 |
| C | 0.173884  | -0.774594 | 1.092936  |
| C | -1.837160 | -0.673696 | -0.299774 |
| C | -0.625459 | 1.530221  | 0.330535  |
| H | 0.225311  | -1.842106 | 0.890711  |
| H | -0.217205 | -0.562609 | 2.084780  |
| H | 1.292549  | -0.397498 | 0.816428  |
| H | -2.426002 | -0.623478 | 0.610242  |
| H | -1.674241 | -1.700339 | -0.608260 |
| H | -2.313117 | -0.109928 | -1.096248 |
| H | -1.254085 | 1.640879  | 1.214685  |
| H | -1.090030 | 2.057024  | -0.502037 |
| H | 0.343626  | 1.987834  | 0.526282  |
| O | 2.347716  | -0.034690 | -0.032017 |
| H | 2.197970  | 0.019789  | -0.983988 |

## TS4

Sum of electronic and zero-point Energies = -308.0957093

|   |           |           |           |
|---|-----------|-----------|-----------|
| C | 0.521881  | -0.251703 | -0.115948 |
| O | -0.252846 | -0.940974 | -0.847417 |
| C | 0.948386  | -0.843323 | 1.216471  |
| C | 1.520561  | 0.626924  | -0.858990 |
| H | 1.438195  | -0.115575 | 1.863602  |
| H | 1.659175  | -1.653083 | 1.030010  |
| H | 0.083941  | -1.261785 | 1.727095  |
| H | 1.935062  | 1.411120  | -0.224223 |
| H | 1.056479  | 1.071282  | -1.736449 |
| H | 2.350062  | -0.000573 | -1.194626 |
| H | -0.674932 | 1.485416  | 0.610818  |
| H | -0.781374 | 2.000759  | -0.328394 |
| H | 0.241266  | 1.629415  | 1.161244  |
| H | -1.560782 | 1.418689  | 1.216795  |
| O | -1.933724 | -0.304760 | -0.180127 |
| H | -2.824837 | -0.638258 | -0.408809 |

TS5

Sum of electronic and zero-point Energies = -232.4835988

|   |           |           |           |
|---|-----------|-----------|-----------|
| C | -0.287629 | 0.000000  | 0.207487  |
| O | -0.102265 | 0.000001  | 1.441764  |
| C | -0.723391 | 1.292064  | -0.478844 |
| C | 1.754385  | 0.000001  | -0.342840 |
| C | -0.723389 | -1.292067 | -0.478842 |
| H | -0.529664 | 1.290311  | -1.550348 |
| H | -0.240859 | 2.148842  | -0.014345 |
| H | -1.802714 | 1.393893  | -0.335085 |
| H | 1.673393  | 0.000017  | -1.421000 |
| H | 2.085663  | -0.916040 | 0.122325  |
| H | 2.085672  | 0.916026  | 0.122351  |
| H | -0.240873 | -2.148843 | -0.014325 |
| H | -0.529638 | -1.290325 | -1.550342 |
| H | -1.802715 | -1.393885 | -0.335106 |

### Dissociation fragments

OH

Sum of electronic and zero-point Energies = -75.6371645

|   |          |          |           |
|---|----------|----------|-----------|
| O | 0.000000 | 0.000000 | 0.108368  |
| H | 0.000000 | 0.000000 | -0.866946 |

CO

Sum of electronic and zero-point Energies = -113.1569402

|   |          |          |           |
|---|----------|----------|-----------|
| C | 0.000000 | 0.000000 | -0.643325 |
| O | 0.000000 | 0.000000 | 0.482493  |

CH<sub>3</sub>

Sum of electronic and zero-point Energies = -39.7339644

|   |           |           |        |
|---|-----------|-----------|--------|
| C | 0.000052  | 0.000049  | -0.000 |
| H | -0.739074 | 0.784747  | 0.000  |
| H | 1.049289  | 0.247247  | 0.000  |
| H | -0.310526 | -1.032289 | 0.000  |

CH<sub>4</sub>

Sum of electronic and zero-point Energies = -40.3963823

|   |           |           |           |
|---|-----------|-----------|-----------|
| C | 0.000022  | -0.000005 | -0.000198 |
| H | 0.620930  | -0.873173 | -0.190716 |
| H | -0.347590 | -0.020451 | 1.031059  |
| H | 0.583279  | 0.903254  | -0.168149 |
| H | -0.856752 | -0.009597 | -0.671005 |

### H<sub>2</sub>O

Sum of electronic and zero-point Energies = -76.3210605

|   |           |           |          |
|---|-----------|-----------|----------|
| O | 0.000000  | 0.116984  | 0.000000 |
| H | 0.763385  | -0.467935 | 0.000000 |
| H | -0.763385 | -0.467935 | 0.000000 |

### Acetone (CH<sub>3</sub>)<sub>2</sub>CO

Sum of electronic and zero-point Energies = -192.7685449

|   |           |           |           |
|---|-----------|-----------|-----------|
| C | 0.000004  | 0.184293  | -0.000007 |
| O | -0.000026 | 1.394552  | 0.000000  |
| C | -1.287712 | -0.611460 | 0.001257  |
| C | 1.287740  | -0.611435 | -0.001268 |
| H | -1.301308 | -1.316831 | 0.834639  |
| H | -1.359290 | -1.203203 | -0.914333 |
| H | -2.141223 | 0.057566  | 0.068662  |
| H | 2.141224  | 0.057587  | -0.069004 |
| H | 1.359439  | -1.202830 | 0.914540  |
| H | 1.301180  | -1.317096 | -0.834396 |

### Methanol CH<sub>3</sub>OH

Sum of electronic and zero-point Energies = -115.5113068

|   |           |           |           |
|---|-----------|-----------|-----------|
| C | -0.667417 | 0.020463  | -0.000001 |
| O | 0.748803  | -0.122100 | -0.000001 |
| H | -1.026809 | 0.543754  | 0.891054  |
| H | -1.083678 | -0.984792 | -0.000570 |
| H | -1.026717 | 0.544753  | -0.890498 |
| H | 1.151281  | 0.750305  | 0.000033  |

### 2-Butanone CH<sub>3</sub>CH<sub>2</sub>COCH<sub>3</sub>

Sum of electronic and zero-point Energies = -231.9808719

|   |           |           |           |
|---|-----------|-----------|-----------|
| C | -0.563138 | 0.219712  | 0.101155  |
| O | -0.959989 | 1.323392  | -0.200588 |
| C | 0.824814  | 0.014990  | 0.684998  |
| C | 1.861557  | -0.203469 | -0.428454 |
| C | -1.413621 | -1.014656 | -0.104236 |
| H | 1.079575  | 0.907954  | 1.255147  |
| H | 0.825096  | -0.841383 | 1.362562  |
| H | 2.855822  | -0.333853 | -0.001936 |
| H | 1.888885  | 0.654347  | -1.099604 |
| H | 1.635343  | -1.091352 | -1.020560 |
| H | -0.842656 | -1.808552 | -0.589177 |
| H | -2.294850 | -0.773533 | -0.692645 |
| H | -1.724982 | -1.400223 | 0.870136  |

### Formaldehyde CH<sub>2</sub>O

Sum of electronic and zero-point Energies = -114.3162554

|   |          |           |           |
|---|----------|-----------|-----------|
| C | 0.000000 | 0.000000  | -0.526996 |
| O | 0.000000 | 0.000000  | 0.673449  |
| H | 0.000000 | 0.937799  | -1.112807 |
| H | 0.000000 | -0.937799 | -1.112807 |

### Acetaldehyde CH<sub>3</sub>CHO

Sum of electronic and zero-point Energies = -153.5431118

|   |           |           |           |
|---|-----------|-----------|-----------|
| C | -0.232392 | 0.396229  | 0.000125  |
| O | -1.232033 | -0.275785 | -0.000031 |
| C | 1.165419  | -0.148490 | -0.000056 |
| H | -0.306421 | 1.503721  | -0.000158 |
| H | 1.701020  | 0.224439  | 0.876949  |
| H | 1.701826  | 0.227538  | -0.875222 |
| H | 1.161671  | -1.235846 | -0.001737 |

### Propaldehyde CH<sub>3</sub>CH<sub>2</sub>CHO

Sum of electronic and zero-point Energies = -192.7560005

|   |           |           |           |
|---|-----------|-----------|-----------|
| C | -0.783436 | -0.222715 | 0.306886  |
| O | -1.809324 | -0.046848 | -0.299448 |
| C | 0.471591  | 0.592090  | 0.143655  |
| C | 1.686309  | -0.287557 | -0.176204 |
| H | -0.710792 | -1.043975 | 1.052811  |
| H | 0.303261  | 1.345663  | -0.624974 |
| H | 0.641842  | 1.110675  | 1.093921  |
| H | 2.594829  | 0.312211  | -0.211969 |
| H | 1.570327  | -0.780587 | -1.141593 |
| H | 1.828351  | -1.060109 | 0.581358  |

### H atom

Sum of electronic and zero-point Energies = -0.4998212
